1 **Dasatinib Plus Quercetin on Uterine Age-Related Dysfunction and Fibrosis in Mice**

2 **Short title: Dasatinib plus quercetin in uterine aging**

3 **Marcelo B. Cavalcante<sup>1,2</sup>, Tatiana D. Saccon<sup>1,3</sup>, Allancer D. C. Nunes<sup>1</sup>, James L. Kirkland<sup>4</sup>,**  
4 **Tamara Tchkonja<sup>4</sup>, Augusto Schneider<sup>3</sup>, Michal M. Masternak<sup>1</sup>**

5 <sup>1</sup>Burnett School of Biomedical Sciences, College of Medicine, University of Central Florida,  
6 Orlando, FL, USA

7 <sup>2</sup>Faculdade de Medicina, Universidade de Fortaleza, Fortaleza, CE, Brazil

8 <sup>3</sup>Faculdade de Nutrição, Universidade Federal de Pelotas, Pelotas, RS, Brazil

9 <sup>4</sup>Robert and Arlene Kogod Center on Aging, Mayo Clinic, Rochester, MN, United States

10

11 **All correspondence should be addressed to:**

12 Marcelo B. Cavalcante

13 Faculdade de Medicina, Universidade de Fortaleza,

14 Fortaleza, CE, Brazil

15 Email: [marcelocavalcante.med@gmail.com](mailto:marcelocavalcante.med@gmail.com)

16 and

17 Michal M. Masternak

18 Burnett School of Biomedical Sciences, College of Medicine, University of Central Florida,

19 Orlando, FL 32827, USA

20 Email: [michal.masternak@ucf.edu](mailto:michal.masternak@ucf.edu)

## 22 **Abstract**

23 Female reproductive function is negatively impacted by age. Animal and human studies show  
24 that fibrosis of the uterus contributes to gestational outcomes. Collagen deposition in the  
25 myometrial and endometrial layers is the main change related to uterine aging. Senolytic  
26 therapies are a potential option for reducing diseases and health complications related to aging.  
27 We investigated effects of aging and the senolytic drug combination of dasatinib plus quercetin  
28 (D+Q) on uterine fibrosis. A total of 40 mice, 20 young females (03-months) and 20 old females  
29 (18-months), were analyzed. Young (Y) and old (O) animals were divided into groups of 10  
30 mice, with one treatment (T) group (YT and OT) and another control (C) group (YC and OC).  
31 Comparative analysis of *Pi3k/Akt1/mTor* and p53 gene expression among the 4 groups was  
32 performed to test effects of age and treatment on collagen deposition in uterine tissue. Uterine  
33 levels of microRNAs (miR34a, miR34b, miR34c, miR146a, miR449a, miR21a, miR126a, and  
34 miR181b) were evaluated. Aging promoted downregulation of genes of the *Pi3k/Akt1/mTor*  
35 signaling pathway (p=0.005, p=0.031, and p=0.028, respectively) as well as a reduction in  
36 expression of miR34c (p=0.029), miR126a (p=0.009), and miR181b (p=0.007). D+Q treatment  
37 increased p53 gene expression (p=0.041) and decreased levels of miR34a (p=0.016). Our results  
38 demonstrate a role for the *Pi3k/Akt1/mTor* signaling pathway in uterine aging and suggest for the  
39 first time a possible anti-fibrotic effect in the uterus of D+Q senolytic therapy.

40 *Key words:* Aging; Uterine fibrosis; Senolytics; mRNA; miRNA

## 42 Introduction

43 The reproductive profile of women has been changing over the last few decades. Older  
44 maternal age by the first gestation and an increased number of pregnancies after 40 years of age  
45 are phenomena observed worldwide, impacting directly on gestational results [1]. Studies in  
46 humans and animals suggest a strong relationship between pregnancy loss and maternal age [2,  
47 3]. In addition to advanced age, other gynecological conditions are related to fertility, such as  
48 polycystic ovary syndrome, leiomyomas, and endometriosis [4]. It is known that ovarian  
49 dysfunction is the major factor responsible for these poor reproductive outcomes, but other  
50 reproductive organs are involved in this complex process [2].

51 An increase in uterine volume with aging is common in some species of rodents, mostly  
52 due to endometrial cystic hyperplasia, as opposed to what occurs in menopausal women, in  
53 whom uterine atrophy is usually evident [3, 5]. The most obvious histological change in the aged  
54 uterus is the collagen deposition (fibrosis) in the muscle layers and stroma [3]. Mechanisms  
55 involved in this uterine fibrosis remain unclear [6]. Collagen deposition in tissues occurs as a  
56 result of chronic inflammatory processes involving several pathways: inflammatory interleukins,  
57 growth factors, caspases, oxidative stress products, and accumulation of senescent cells [6].  
58 These chronic inflammatory pathways are also involved in undesired obstetric outcomes such as  
59 loss of pregnancies and preterm delivery [7].

60 The phosphoinositide 3-kinase (*Pi3k*) / protein kinase B (*Akt*) / mammalian target of  
61 rapamycin (*mTor*) pathway is an intracellular signaling mechanism that regulates several cellular  
62 functions, including cell growth, proliferation, differentiation, transformation, and survival,  
63 among others. Etiological processes underlying many gynecological conditions have not yet been

64 completely identified. The *Pi3k/Akt1/mTor* and p53 signaling pathways appear to be involved in  
65 the pathophysiological mechanisms of gynecopathies including polycystic ovarian syndrome,  
66 premature ovarian failure, leiomyoma, endometriosis, and gynecological cancers [8-15]. This  
67 signaling pathway has also been implicated in fibrosis in different tissues, such as the kidney,  
68 lung, and liver [16-20].

69 *Pi3k* can be activated by binding of growth factors and steroid hormones to cell surface  
70 receptors, promoting conversion of phosphatidylinositol-4,5 bisphosphate (*PiP2*) to  
71 phosphatidylinositol-3,4,5 triphosphate (*PiP3*) [21]. The other components of the signaling  
72 pathway (*Akt-mTor*) are activated after *Pi3k*. *Pi3k* is a shared activator of two pro-fibrotic  
73 signaling pathways: *PAK2-Abl* and *Akt-mTor*. The activity of *Pi3k* is downregulated by enzymes  
74 phosphatases such as phosphatase and tensin homolog (*Pten*), which has been studied  
75 extensively with regard to mechanisms of gynecological cancers [11, 21]. The *Pi3k/Akt1/mTor*  
76 and p53 signaling pathways may also be jointly regulated by several microRNAs [17, 18, 22].  
77 MicroRNAs are non-coding RNAs that act as transcriptional silencers and are involved in  
78 different cellular functions through post-transcriptional regulation of gene expression. Several  
79 microRNAs have been associated with the fibrosis process in different tissues (lung, liver,  
80 kidney, heart, skin) involving different mechanisms. Some of the most studied microRNAs in the  
81 process of fibrosis are: the miR34 family, miR126, miR181, miR21, miR146a, and miR 449 [22-  
82 24].

83 Targeting senescent cells with senolytic drugs might slow down or prevent fibrosis  
84 processes in different tissues and organs [16, 25-27]. Currently, quercetin (Q) and dasatinib (D),  
85 administered alone or in combination (D+Q), are the most studied senolytic drugs [28]. Different  
86 authors have reported anti-fibrotic effects of these drugs in tissues such as kidney, lung, and liver

87 [25-27]. Quercetin is a flavonoid with antioxidant, anti-inflammatory, immunoprotective, and  
88 even anticarcinogenic effects [29]. Quercetin appears to have both estrogenic and antiestrogenic  
89 effects on the uterus, depending on the dose. However, studies about potential antifibrotic and  
90 senolytic effects of these drugs in the uterus are few, and there is no published study about  
91 effects of the D+Q combination on the uterus [30]. Dasatinib is an antineoplastic drug used to  
92 treat chronic myeloid leukemia and acute lymphoblastic leukemia [31]. Dasatinib's anti-fibrotic  
93 effect has been ascribed during the last decade to its action on different signaling pathways such  
94 as *Pi3k/Akt1/mTor*, p53, and inflammatory pathways [25, 32, 33].

95 It is important to understand more completely the physiological mechanisms of uterine  
96 aging, as well as to discover therapies that delay this process. This could contribute to  
97 improvement in gestational outcomes. The aim of our study was to test the impact of aging on  
98 uterine fibrosis and the potential anti-fibrotic structural and molecular effects of the senolytic  
99 D+Q combination on uterine aging.

100

## 101 **Material and Methods**

### 102 **Animal Studies**

103 The Institutional Animal Care and Use Committee of the University of Central Florida  
104 approved all procedures in this study. BALB/c mice were obtained from NIA Office of  
105 Biological Resources and the NIA Aged Rodent Colonies and were maintained in a pathogen-  
106 free facility under temperature- and light- controlled conditions ( $22 \pm 2^{\circ}\text{C}$ , 12h light/dark  
107 regimen) with free access to food and water. A total of 40 mice (females) were divided into four

108 groups procedures: 1) Young controls: 3 month old mice given placebo treatment (YC; n=10);  
109 2); Young treatment: 3 month old mice given dasatinib plus quercetin (D+Q) treatment (YT;  
110 n=10); 3) Old controls: 18 month old mice given placebo (OC; n=10); and 4) Old treatment: 18  
111 month old mice given D+Q (OT; n=10).

112 The intervention (D+Q or placebo) was performed for 3 consecutive days every 2 weeks  
113 over a 10 week period. Dasatinib was purchased from LC Laboratories (Woburn, MA) and  
114 Quercetin from Sigma-Aldrich (St Louis, MO). Dasatinib (5 mg/kg) plus Quercetin (50 mg/kg)  
115 was prepared in a diluted solution composed of 10% ethanol (Sigma-Aldrich E7023; St Louis,  
116 MO), 30% polyethylene glycol 400 (Sigma-Aldrich 91893; St Louis, MO), and 60% Phosal 50  
117 PG (Lipoid LLC, Newark, NJ). For both treatment groups (YT and OT), D+Q was administrated  
118 by oral gavage in 100–150 $\mu$ L and the control groups (YC and OC) received placebo solution by  
119 oral gavage.

120

## 121 **Histology/ Masson's Trichrome Assay**

122 Uterus samples were collected and dissected and small tissue fragments were placed into  
123 10% neutral-buffered formalin immediately after necropsy and fixed for 24 hours. Thereafter, the  
124 samples were dehydrated in ethanol, clarified in xylol, and embedded in Paraplast. The samples  
125 were sectioned (5 $\mu$ m) and stained with a Masson's Trichrome 2000<sup>TM</sup> Stain kit (American  
126 Mastertech Scientific INC, McKinney, TX-USA) to detect deposition of interstitial collagen. The  
127 histological preparations were examined using a microscope (Axio Observer A1, Zeiss) with 4,  
128 10, and 20x lenses.

129

## 130 **Western Blotting**

131           The uterine tissue samples were homogenized in lysis buffer T-PER (Thermo Scientific,  
132 Waltham, MA, USA) containing a mixture of protease and phosphatase inhibitors. A total of  
133 30µg protein was separated by electrophoresis and transferred to PVDF membranes. Nonspecific  
134 binding of antibodies was blocked with 5% milk in TBS-T for 1 hour at room temperature and  
135 probed with diluted antibodies specific for Collagen-1 (1:1000, ab88147, Abcam, Cambridge,  
136 UK) and  $\beta$ -actin (1:1000, G043, abm, Richmond, CA), followed by incubation with appropriate  
137 specific secondary antibodies. Immunoreactive bands were quantified by densitometry using the  
138 ImageJ software (Image Processing and Analysis in Java; U.S. National Institutes of Health  
139 Bethesda, MD, USA).

140

## 141 **RNA Extraction and Gene Expression**

142           About 50 mg of the uterine tissue samples were homogenized with 1.0 mm zirconium  
143 oxide beads and 700 µL of Qiazol (Qiagen, Valencia, CA, USA). Total RNA was isolated using  
144 Qiagen RNeasy Mini Kit (Qiagen) columns following the manufacturer's instructions. RNA  
145 concentration was measured by spectrophotometer and 1 µg of total RNA was converted into  
146 complementary DNA (cDNA) using an iScript reverse transcription kit (Bio-Rad Laboratories,  
147 Hercules, CA, USA). The cDNA samples were diluted to 10 ng/uL and stored at -20 C.

148           Real-time PCR using SYBR Green dye was used to evaluate uterine gene expression. The  
149 primers used in this study are listed in Table 1. PCR reactions were performed in duplicate, by  
150 adding 5µL of SYBR Green Master Mix (Applied Biosystems, Foster City, CA, USA), 0.4µL of  
151 forward and reverse primers (10µM solution), and 2µL of each cDNA sample, in a total volume

152 of 20 $\mu$ L. Fluorescence was quantified using the Applied Biosystems QuantStudio™ 7 Flex  
153 System Fast RT-PCR system (Applied Biosystems™). For each assay, 40 PCR cycles were run  
154 (95 C for 3s and 62 C for 30s), and a dissociation curve was performed at the end of the reaction  
155 to verify the amplification of a single PCR product. Each assay included a negative control using  
156 RNase-free water.

157 **Table 1. Primer pairs (forward and reverse) used in the experiment**

| Genes                                 | Primers sequences (forward and reverse)                         | Product Size | Reference NCBI |
|---------------------------------------|-----------------------------------------------------------------|--------------|----------------|
| Beta-2 microglobulin ( $\beta 2m$ )   | F: 5'-AAGTATACTCACGCCACCCA-3'<br>R: 5'-CAGGCGTATGTATCAGTCTC-3'  | 217          | NM_009735.3    |
| Phosphoinositide-3-kinase (Pi3k)      | F: 5'-TAGCTGCATTGGAGCTCCTT-3'<br>R: 5'-TACGAACTGTGGGAGCAGAT-3'  | 119          | NM_011083.2    |
| Protein kinase B (Akt1)               | F: 5'-CCGTTCTTTGCCAACATCG-3'<br>R: 5'-ACACACTCCATGCTGTCATCTT-3' | 168          | NM_001331107.1 |
| Mammalian target of rapamycin (mTOR)  | F: 5'-CGGCAACTTGACCATCCTCT-3'<br>R: 5'-TGCTGGAAGGCGTCAATCTT-3'  | 101          | NM_020009.2    |
| Phosphatase and Tensin homolog (PTEN) | F: 5'-AGGCACAAGAGGCCCTAGAT-3'<br>R: 5'-CTGACTGGGAATTGTGACTCC-3' | 74           | XM_006526769.2 |
| p53                                   | F: 5'-TCACAGTCGGATATCAGCCT-3'<br>R: 5'-ACACTCGGAGGGCTTCACTT-3'  | 172          | NM_001127233.1 |

158  
159 Data were normalized using beta-2 microglobulin ( $\beta 2m$ ) as a housekeeping gene. To  
160 calculate relative expression, the equation  $2^{A-B}/2^{C-D}$  was used, where  $A$  is the threshold cycle  
161 number of the first control sample of the gene of interest,  $B$  is the threshold cycle number in each  
162 gene of interest sample,  $C$  is the threshold cycle value of the first  $\beta 2m$  in the control sample, and  
163  $D$  is the threshold cycle number of  $\beta 2m$  in each sample. This formula resulted in a relative  
164 expression of 1 for the first control sample, and then all the other samples were calculated in



165 relation to the first sample. After that, the average of the YC group was calculated and used as a  
166 denominator for the other groups' averages to calculate the fold change in gene expression  
167 compared to the control group [34].

168

## 169 **MicroRNA Expression**

170 A total of 10ng of RNA was converted into complementary DNA (cDNA) using the  
171 TaqMan® Advanced miRNA Assays (Applied Biosystems™). The cDNA samples were diluted  
172 at 1:10 and stored at -20 C. The reactions were as *per* the manufacturer's recommendation.  
173 Briefly, real-time PCR reactions were performed in duplicate, by adding 10 µL of TaqMan®  
174 Fast Advanced Master Mix (2X), 1 µL of TaqMan® Advanced miRNA Assay (20X), 4 µL of  
175 RNase-free water, and 5 µL of the diluted cDNA template to each reaction well in the plate. The  
176 total volume was 20 µL per reaction well. Fluorescence was quantified using the Applied  
177 Biosystems QuantStudio™ 7 Flex System Fast RT-PCR system (Applied Biosystems™). For  
178 each assay, 40 PCR cycles were run (95 C for 1s and 60 C for 20s). Each assay included a  
179 negative control using RNase free water. The TaqMan® Advanced miRNA Assays (Applied  
180 Biosystems™) used were: mmu-miR-16-5p (477860\_mir), mmu-miR-146a-5p (478399\_mir),  
181 mmu-miR-449a-5p (478561\_mir), mmu-miR-21a-5p (477975\_mir), mmu-miR-126a-5p  
182 (477888\_mir), mmu-miR-34a-5p (478048\_mir), hsa-miR-34b-5p (478050\_mir), mmu-miR-34c-  
183 5p (478052\_mir), and hsa-miR-181b-5p (478583\_mir).

184 Data were normalized using miR16-5p as a housekeeping microRNA. To calculate  
185 relative expression, the equation  $2^{A-B}/2^{C-D}$  was used, where  $A$  is the threshold cycle number of  
186 the first control sample of the miRNA of interest,  $B$  is the threshold cycle number in each

187 miRNA of interest sample,  $C$  is the threshold cycle value of the first miR16 in the control  
188 sample, and  $D$  is the threshold cycle number of miR16-5p in each sample. The formula resulted  
189 in a relative expression of 1 for the first control sample, and then all the other samples were  
190 calculated in relation to the first sample. After that, the average of the YC group was calculated  
191 and used as a denominator for the other groups' averages to calculate the fold change in gene  
192 expression compared to the control group [34].

193

## 194 **Statistical Analysis**

195 Statistical analysis was performed using GraphPad Prism 7 software (GraphPad Software  
196 Inc., La Jolla, CA, USA). Gene expression (mRNA), miRNA expression, and protein levels were  
197 compared between groups by 2-way ANOVA and p values for age, treatment, and its interaction  
198 are presented. When the interaction was significant, a multiple comparisons test was performed  
199 using Tukey's test. Categorical variables were compared using the chi-square test. A p value  
200 lower than 0.05 was considered statistically significant.

201

## 202 **Results**

203 During tissue dissection, it was noted that in old animals, 7 out of 20 mice (35%) had a  
204 dilated uterus. Among all old mice that had uterine dilation, 4/10 (40%) were from the D+Q  
205 group (OT) and 3/10 (30%) were from the control group (OC). There was no effect of treatment  
206 on the percentage of mice with a dilated uterus ( $p=0.639$ ). Importantly, there were no cases of  
207 dilated uterus in young animals. The uterine tissue from mice with dilated uteruses was excluded

208 from further experiments, which left remaining 6 old animals in the D+Q group (OT) and 7 old  
209 animals in the control group (OC).

210 Collagen deposition (fibrotic process) was observed in the muscular and endometrial  
211 uterine layers in histological analyses using Masson's trichrome staining and confirmed by the  
212 presence of type 1 collagen in the uterine samples. Collagen deposition was significantly higher  
213 in old mice compared to young mice (age effect,  $p < 0.001$ , Fig. 1) and there was no difference in  
214 fibrosis in treated groups compared to placebo (treatment effect,  $p = 0.503$ , Fig. 1).

215

216 **Figure 1: Uterine type 1 collagen deposition evaluation.** (A) Collagen-1 statistical Western  
217 Blot analysis, letters indicate differences between groups ( $p < 0.05$ ), values were plotted as mean  
218  $\pm$  standard error of the mean. (B) Collagen-1 and  $\beta$ -actin Western Blot bands. (C) Representative  
219 Masson's Trichrome stained images of uterine tissue. OT: old treatment; OC: old control; YT:  
220 young treatment; YC: young control.

221

222 Evaluation of uterine expression of different genes related to the *Pi3k/Akt1/mTor*  
223 signaling pathway revealed that aging was associated with inhibition of *Pi3k* and its downstream  
224 mediators, *Akt1* and *mTor*. The relative expression of *Pi3k*, *Akt1* and *mTor* was significantly  
225 lower in old mice compared to young mice ( $p = 0.005$ ,  $p = 0.031$ ,  $p = 0.028$ , respectively, Fig. 2A-  
226 C). However, there was no treatment effect on the expression of *Pi3k*, *Akt1*, or *mTor* ( $p = 0.051$ ,  
227  $p = 0.153$ ,  $p = 0.409$ , respectively, Fig. 2A-C). Regarding the gene expression of *Pten*, there was no  
228 effect of either treatment or age ( $p = 0.394$ ,  $p = 0.064$ , respectively, Fig. 2D). Interestingly, p53  
229 mRNA was upregulated with the D+Q treatment compared to control groups ( $p = 0.041$ , Fig. 2E),  
230 while there was no aging effect ( $p = 0.140$ , Fig. 2E).

231

232 **Figure 2: Analysis of relative uterine gene expression in treatment and control groups at**  
233 **different ages.** A. Phosphoinositide 3-kinase (*Pi3k*). B. Protein kinase B (*Akt*). C. Mammalian  
234 target of rapamycin (*mTor*). D. Phosphatase and tensin homolog (*Pten*). E. p53. Values are  
235 shown as mean  $\pm$  standard error of the mean. Two-way ANOVA was performed and the p values  
236 for age, treatment, and their interaction are presented ( $p < 0.05$ ).

237

238 Analysis of expression of different uterine microRNAs related to fibrosis pathways  
239 revealed that miR126a, miR34c, and miR181b were downregulated in old mice compared to  
240 young animals ( $p=0.009$ ,  $p=0.029$ ,  $p=0.007$ , respectively, Fig. 3G, C, H), however D+Q  
241 treatment did not affect expression levels in these miRNAs ( $p=0.958$ ,  $p=0.352$ ,  $p=0.446$ ,  
242 respectively, Fig. 3G, C, H). Moreover, expression of miR34a was significantly decreased by  
243 D+Q treatment compared with the placebo control ( $p=0.016$ , Fig. 3A), while there was no  
244 uterine aging effect on miR34a expression ( $p=0.269$ , Fig. 3A). Additionally, aging and treatment  
245 did not affect the levels of miR146a ( $p=0.116$  and  $p=0.067$ , treatment and age respectively, Fig.  
246 3D), miR449a ( $p=0.632$  and  $p=0.956$ , Fig. 3E), miR21a ( $p=0.416$  and  $p=0.737$ , Fig. 3F), and  
247 miR34b ( $p=0.388$  and  $p=0.490$ , Fig. 3B).

248

249 **Figure 3: Analysis of relative uterine microRNA levels in the treatment and control groups**  
250 **at different ages.** A. mmu-miR-34a-5p (miR34a). B. hsa-miR-34b-5p (miR34b). C. mmu-miR-  
251 34c-5p (miR34c). D. mmu-miR-146a-5p (miR146a). E. mmu-miR-449a-5p (miR449a). F. mmu-  
252 miR-21a-5p (miR21a). G. mmu-miR-126a-5p (miR126a). H. hsa-miR-181b-5p (miR181b).  
253 Values are shown as mean  $\pm$  standard error of the mean. Two-way ANOVA was performed and  
254 p values for age, treatment, and their interaction are presented ( $p < 0.05$ ).

255

## 256 Discussion

257 The main morphological changes observed during the mice uterine aging were increased  
258 uterine volume and fibrosis. In our study, dilated uterus was observed in 35% of the old mice,

259 with no cases observed in any young mice. Interestingly, the D+Q treatment did not reduce the  
260 prevalence of uterine dilatation in old mice, while previously reported by Wilkinson *et al* a high  
261 prevalence of dilated uterus during aging (87%, 13/15 of old mice compared to 7%, 1/15 among  
262 young mice) was reduced by a high dose (42ppm) of rapamycin, a drug that inhibits the mTOR  
263 signaling pathway. However, in this study the authors continued the treatment for 13 months  
264 (from 9 to 22 months of age), which could prevent the development uterine dilatation rather than  
265 reverse it [5]. Despite that, D+Q treatment dose and time (10 weeks), which was started late in  
266 life in our study were not sufficient to observe a reduction in the prevalence of dilated uterus  
267 among the old mice. It might require long-term treatment starting in middle aged animals to  
268 observe possible preventive effects of D+Q on dilated uterus. Yet, due to upregulation of the  
269 *Pi3k/Akt/mTor* signaling pathway in endometrial hyperplasia and gynecological cancer, the  
270 samples with these pathological changes were removed from further genetic and histochemical  
271 analysis [9, 11].

272 The main feature of the uterine fibrosis process is collagen deposition, determined  
273 primarily by estrogen, a *Pi3k/Akt/mTor* signaling pathway activator [3, 35]. Therefore, uterine  
274 fibrosis observed in uterine aging is a chronic process, related to long and cyclical uterine  
275 exposure to estrogen. The *Pi3k/Akt/mTor* signaling pathway is downregulated in menopause due  
276 to a hypoestrogenic state [36]. Chong *et al* demonstrated that the change in gene expression in  
277 uterine muscle is dependent on exposure to female hormones, suggesting that the longer interval  
278 between menarche and first pregnancy worsens obstetric morbidity due to impaired myometrial  
279 function [37]. The literature reports an importance of *Pten* in improving longevity, due to its  
280 inhibitory action on *Pi3k* [38]. The increase in *Pten* gene expression could also contribute to

281 *Pi3k/Akt/mTor* signaling pathway downregulation and consequently decrease collagen deposition  
282 [38].

283 Therefore, downregulation of the *Pi3k/Akt/mTor* signaling pathway at different points  
284 may be a useful treatment that can prevent the progression or even reverse fibrosis [39, 40]. One  
285 of the proposed therapies is single or combined use of D+Q that has an anti-fibrosis effect on  
286 different tissues such as lung, liver, kidney, and heart, but there is no report in the literature on  
287 the effect of these drugs on the uterine fibrosis process [25-27, 33, 41, 42]. Gao *et al* found that  
288 the cardiac anti-fibrotic effect of isorhamnetin, a quercetin methylated metabolite, occurs due to  
289 blockage of the *Pi3k/Akt/mTor* signaling pathway [43]. Cao *et al* found that quercetin is able to  
290 reduce the TGF- $\beta$ -induced fibrotic process in human tubular epithelial HK-2 cells through miR-  
291 21 suppression and PTEN up-regulation [44]. Zhang *et al* in an *in vitro* study of the imatinib-  
292 resistant chronic myeloid leukemia cell line K562 (K562R<sup>IMT</sup>) demonstrated the inhibitory effect  
293 of dasatinib on the *Pi3k/Akt/mTor* signaling pathway and observed a slight upregulation of *Pten*  
294 at high doses of the drug [45]. Yilmaz *et al* observed that isolated use of dasatinib (8mg/kg/day  
295 for 21 days) was effective in reducing pulmonary fibrosis in an animal model by raising *Pten*  
296 levels [32]. Animal and human studies have shown that senolytic interventions provide a  
297 promising therapeutic possibility in cases of pulmonary fibrosis [28, 46, 47]. However, Roos *et*  
298 *al* reported that D+Q alleviated established vasomotor dysfunction in aged or atherosclerotic  
299 mice with no anti-fibrotic effect on the vascular intimal layer, which may suggest tissue and  
300 dose-dependent anti-fibrotic effects [48].

301 In our experiment, we showed the effect of aging on downregulation of the  
302 *Pi3k/Akt1/mtTor* signaling pathway in uterine tissue, but interestingly D+Q treatment did not  
303 promote an inhibitory effect on this pathway by either reducing *Pi3k/Akt1/mTor* gene expression

304 or increasing *Pten* mRNA. As reviewed above, the effect of single or combined use of these  
305 drugs may be dose-, duration of treatment-, as well as tissue-dependent. In our study, the specific  
306 D+Q protocol used may explain the absence of a uterine anti-fibrotic effect due to the short  
307 duration of the intervention.

308       Importantly, our study indicated that D+Q treatment significantly increased the  
309 expression of p53 mRNA, the tumor suppressor gene that is related to a higher incidence of  
310 cancer in elderly people, which is not only due to a high frequency of mutant forms but its  
311 decline in its function with advancing age [13]. Several authors have described an increase in  
312 p53 levels with the isolated use of quercetin or dasatinib. Srivastava *et al* observed higher p53  
313 expression in quercetin-treated tumor tissues [49]. The use of dasatinib also increased p53 acute  
314 myeloid leukemia stem cell gene expression [50]. p53 has also been described as a regulator of  
315 different microRNAs expression levels. The miR34 family includes the first miRNAs described  
316 as being regulated by p53 [51]. MiR34a has been found to be pro-fibrotic in various tissues such  
317 as lung, kidney, and heart [23, 52, 53]. The therapeutic inhibition of miR34a was effective in  
318 improving cardiac function after myocardial infarction in an animal model [54]. In our study, it  
319 was observed that the D+Q treatment promoted downregulation of miR34a, which could indicate  
320 a possible antifibrotic effect. Although the major regulatory pathway for miR34a expression is  
321 directly related to p53 levels, other p53-independent regulatory pathways are also known to be  
322 involved [55]. Therefore, p53-independent regulation of pro-fibrotic miR34a could contribute to  
323 the low expression of miR34a together with the high expression of p53 in our sample. Other  
324 members of the miR34 family were not impacted by D+Q treatment, and only miR34c was  
325 downregulated with aging. This is consistent with findings showing Pi3k pathway attenuation of  
326 the fibrotic process with age.

327           MiR21 is another fibrotic microRNA and it is regulated by *Akt* expression [22]. In our  
328 sample, although *Akt1* was downregulated with age, we did not observe similar downregulation  
329 of miR21a. Other pro-fibrotic microRNAs such as miR126a and miR181b were also  
330 downregulated in old uterine tissue, while miR146a and miR449a did not change in their  
331 expression either with age or treatment. The effect of age on serum and tissue microRNA levels  
332 has been tested in normal and long-lived (Ames dwarf) mice. Schneider *et al* observed an effect  
333 of age on levels of 22 microRNAs (out of 404 detected in sequencing) present in ovarian tissue  
334 from normal mice, and in 33 miRNAs from Ames dwarf mice [56]. Victoria *et al* also showed  
335 genotype-specific changes in the circulating levels of 21 miRNAs during aging. [57]. Therefore,  
336 this suggests that regulation of miRNA expression during aging is central to adaptation of body  
337 responses. As we have shown in our current studies, some miRNAs change with age in the uterus  
338 and others are regulated by D+Q treatment, further suggesting such a role.

339

## 340 **Conclusions**

341           In summary, our findings suggest that uterine fibrosis is associated with the  
342 *Pi3k/Akt1/mTor* signaling pathway, with possible interaction and mediation of known pro-  
343 fibrotic microRNAs. Importantly, age-related fibrosis appears to be a slow and continuous  
344 process that might, over time, cause development of serious pathological complications,  
345 including those observed in our animals: a dilated uterus. Due to slow development of this age-  
346 related disease, D+Q senolytic therapy in the present protocol may not have been continued long  
347 enough for attenuating uterine collagen deposition. However, alteration of p53 mRNA and  
348 significant reduction of pro-fibrotic miR34a expression by D+Q suggest that implementing the



349 intervention earlier in life and for a longer duration might provide protection from uterine age-  
350 related fibrotic changes. Conceivably, this might increase reproductive age as well as provide  
351 some protection against gynecological cancers. Based on these results, further, longer, and more  
352 mechanistic studies are required to determine whether *Pi3k/Akt1/mTor* pathway downregulation  
353 as well as inhibition of some microRNAs may provide new therapeutic targets to prevent uterine  
354 collagen deposition and, consequently, improve the reproductive performance of this organ in  
355 older females.

356

### 357 **Authors' Contributions**

358 MMM, MBC, TS, ADCN, AS, JLK, and TT contributed to experimental conception and design.  
359 MBC, TS, and ADCN performed the experiments. MBC, ADCN, and AS analyzed the data.  
360 MBC and ADCN wrote the first draft of the paper. All authors reviewed and approved the final  
361 manuscript.

362

### 363 **Funding**

364 This work was supported by NIH/NIA grants R15 AG059190 and R03 AG059846 (MMM), P01  
365 AG062413 and R37 AG013925 (JLK), Robert and Arlene Kogod, the Connor Group, Robert J.  
366 and Theresa W. Ryan, and the Ted Nash Long Life and Noaber Foundations.

367

### 368 **Conflict of interest**

369 The authors declare that there is no conflict of interest that could be perceived as prejudicing the  
370 impartiality of this research reported.

371

372

## 374 References

- 375 1. Rossen LM, Ahrens KA, Branum AM. Trends in Risk of Pregnancy Loss Among US Women, 1990-  
376 2011. *Paediatric and Perinatal Epidemiology*. 2018;32(1):19-29.<https://doi.org/10.1111/ppe.12417>.  
377 PMID: 29053188.
- 378 2. Sauer MV. Reproduction at an advanced maternal age and maternal health. *Fertil Steril*. 2015  
379 May;103(5):1136-43.<https://doi.org/10.1016/j.fertnstert.2015.03.004>. PMID: 25934599.
- 380 3. Kong S, Zhang S, Chen Y, Wang W, Wang B, Chen Q, et al. Determinants of uterine aging: lessons  
381 from rodent models. *Sci China Life Sci*. 2012 Aug;55(8):687-93.[https://doi.org/10.1007/s11427-012-](https://doi.org/10.1007/s11427-012-4356-1)  
382 4356-1. PMID: 22932884.
- 383 4. Vander Borgh M, Wyns C. Fertility and infertility: Definition and epidemiology. *Clin Biochem*.  
384 2018 Dec;62:2-10.<https://doi.org/10.1016/j.clinbiochem.2018.03.012>. PMID: 29555319.
- 385 5. Wilkinson JE, Burmeister L, Brooks SV, Chan CC, Friedline S, Harrison DE, et al. Rapamycin slows  
386 aging in mice. *Aging Cell*. 2012 Aug;11(4):675-82.<https://doi.org/10.1111/j.1474-9726.2012.00832.x>.  
387 PMID: 22587563.
- 388 6. Wynn TA. Cellular and molecular mechanisms of fibrosis. *J Pathol*. 2008 Jan;214(2):199-  
389 210.<https://doi.org/10.1002/path.2277>. PMID: 18161745.
- 390 7. Marquez CMD, Ibana JA, Velarde MC. The female reproduction and senescence nexus. *Am J*  
391 *Reprod Immunol*. 2017 May;77(5).<https://doi.org/10.1111/aji.12646>. PMID: 28185345.
- 392 8. Makker A, Goel MM, Das V, Agarwal A. PI3K-Akt-mTOR and MAPK signaling pathways in  
393 polycystic ovarian syndrome, uterine leiomyomas and endometriosis: an update. *Gynecol Endocrinol*.  
394 2012 Mar;28(3):175-81.<https://doi.org/10.3109/09513590.2011.583955>. PMID: 21916800.
- 395 9. Bajwa P, Nielsen S, Lombard JM, Rassam L, Nahar P, Rueda BR, et al. Overactive mTOR signaling  
396 leads to endometrial hyperplasia in aged women and mice. *Oncotarget*. 2017 Jan 31;8(5):7265-75.  
397 <https://doi.org/10.18632/oncotarget.13919>. PMID: 27980219.
- 398 10. Makker A, Goel MM, Mahdi AA. PI3K/PTEN/Akt and TSC/mTOR signaling pathways, ovarian  
399 dysfunction, and infertility: an update. *J Mol Endocrinol*. 2014 Dec;53(3):R103-18.  
400 <https://doi.org/10.1530/jme-14-0220>. PMID: 25312969.
- 401 11. Shi X, Wang J, Lei Y, Cong C, Tan D, Zhou X. Research progress on the PI3K/AKT signaling  
402 pathway in gynecological cancer (Review). *Mol Med Rep*. 2019 Jun;19(6):4529-35.  
403 <https://doi.org/10.3892/mmr.2019.10121>. PMID: 30942405.
- 404 12. Hu W, Feng Z, Atwal GS, Levine AJ. p53: a new player in reproduction. *Cell Cycle*. 2008 Apr  
405 1;7(7):848-52. <https://doi.org/10.4161/cc.7.7.5658>. PMID: 18414047.
- 406 13. Feng Z, Hu W, Teresky AK, Hernando E, Cordon-Cardo C, Levine AJ. Declining p53 function in the  
407 aging process: a possible mechanism for the increased tumor incidence in older populations. *Proc Natl*  
408 *Acad Sci U S A*. 2007 Oct 16;104(42):16633-8. <https://doi.org/10.1073/pnas.0708043104>. PMID:  
409 17921246.
- 410 14. Wu X, Blanck A, Olovsson M, Moller B, Favini R, Lindblom B. Apoptosis, cellular proliferation and  
411 expression of p53 in human uterine leiomyomas and myometrium during the menstrual cycle and after  
412 menopause. *Acta Obstet Gynecol Scand*. 2000 May;79(5):397-404. PMID: 10830768.
- 413 15. Hirota Y, Daikoku T, Tranguch S, Xie H, Bradshaw HB, Dey SK. Uterine-specific p53 deficiency  
414 confers premature uterine senescence and promotes preterm birth in mice. *J Clin Invest*. 2010  
415 Mar;120(3):803-15. <https://doi.org/10.1172/jci40051>. PMID: 20124728.
- 416 16. Dou F, Liu Y, Liu L, Wang J, Sun T, Mu F, et al. Aloe-Emodin Ameliorates Renal Fibrosis Via  
417 Inhibiting PI3K/Akt/mTOR Signaling Pathway In Vivo and In Vitro. *Rejuvenation Res*. 2019 Jun;22(3):218-  
418 29. <https://doi.org/10.1089/rej.2018.2104>. PMID: 30215298.

- 419 17. Yang R, Xu X, Li H, Chen J, Xiang X, Dong Z, et al. p53 induces miR199a-3p to suppress SOCS7 for  
420 STAT3 activation and renal fibrosis in UUO. *Sci Rep.* 2017 Feb 27;7:43409.  
421 <https://doi.org/10.1038/srep43409>. PMID: 28240316.
- 422 18. Shetty SK, Tiwari N, Marudamuthu AS, Puthusseri B, Bhandary YP, Fu J, et al. p53 and miR-34a  
423 Feedback Promotes Lung Epithelial Injury and Pulmonary Fibrosis. *Am J Pathol.* 2017 May;187(5):1016-  
424 34. <https://doi.org/10.1016/j.ajpath.2016.12.020>. PMID: 28273432.
- 425 19. Gogiraju R, Xu X, Bochenek ML, Steinbrecher JH, Lehnart SE, Wenzel P, et al. Endothelial p53  
426 deletion improves angiogenesis and prevents cardiac fibrosis and heart failure induced by pressure  
427 overload in mice. *J Am Heart Assoc.* 2015 Feb 24;4(2). <https://doi.org/10.1161/jaha.115.001770>. PMID:  
428 25713289.
- 429 20. Liu Y, Yang P, Chen N, Lin S, Liu M. Effects of recombinant human adenovirus-p53 on the  
430 regression of hepatic fibrosis. *Int J Mol Med.* 2016 Oct;38(4):1093-100.  
431 <https://doi.org/10.3892/ijmm.2016.2716>. PMID: 27572658.
- 432 21. He W, Dai C. Key Fibrogenic Signaling. *Curr Pathobiol Rep.* 2015;3(2):183-92.  
433 <https://doi.org/10.1007/s40139-015-0077-z>. PMID: 25973345.
- 434 22. Xin G, Zhou G, Zhang X, Wang W. Potential role of upregulated microRNA146b and 21 in renal  
435 fibrosis. *Mol Med Rep.* 2017 Sep;16(3):2863-7. <https://doi.org/10.3892/mmr.2017.6929>. PMID:  
436 28714020.
- 437 23. Cui H, Ge J, Xie N, Banerjee S, Zhou Y, Liu RM, et al. miR-34a promotes fibrosis in aged lungs by  
438 inducing alveolarepithelial dysfunctions. *Am J Physiol Lung Cell Mol Physiol.* 2017 Mar 1;312(3):L415-  
439 L24. <https://doi.org/10.1152/ajplung.00335.2016>. PMID: 27979858.
- 440 24. Feng B, Chen S, Gordon AD, Chakrabarti S. miR-146a mediates inflammatory changes and  
441 fibrosis in the heart in diabetes. *J Mol Cell Cardiol.* 2017 Apr;105:70-6.  
442 <https://doi.org/10.1016/j.yjmcc.2017.03.002>. PMID: 28279663.
- 443 25. Cruz FF, Horta LF, Maia Lde A, Lopes-Pacheco M, da Silva AB, Morales MM, et al. Dasatinib  
444 Reduces Lung Inflammation and Fibrosis in Acute Experimental Silicosis. *Plos One.* 2016;11(1):e0147005.  
445 <https://doi.org/10.1371/journal.pone.0147005>. PMID: 26789403.
- 446 26. Mohammadalipour A, Karimi J, Khodadadi I, Solgi G, Hashemnia M, Sheikh N, et al. Dasatinib  
447 prevent hepatic fibrosis induced by carbon tetrachloride (CCl4) via anti-inflammatory and antioxidant  
448 mechanism. *Immunopharmacol Immunotoxicol.* 2017 Feb;39(1):19-27.  
449 <https://doi.org/10.1080/08923973.2016.1263860>. PMID: 27908221.
- 450 27. Lu H, Wu L, Liu L, Ruan Q, Zhang X, Hong W, et al. Quercetin ameliorates kidney injury and  
451 fibrosis by modulating M1/M2 macrophage polarization. *Biochem Pharmacol.* 2018 Aug;154:203-12.  
452 <https://doi.org/10.1016/j.bcp.2018.05.007>. PMID: 29753749.
- 453 28. Kirkland JL, Tchkonja T, Zhu Y, Niedernhofer LJ, Robbins PD. The Clinical Potential of Senolytic  
454 Drugs. *J Am Geriatr Soc.* 2017 Oct;65(10):2297-301. <https://doi.org/10.1111/jgs.14969>. PMID:  
455 28869295.
- 456 29. Andres S, Pevny S, Ziegenhagen R, Bakhiya N, Schafer B, Hirsch-Ernst KI, et al. Safety Aspects of  
457 the Use of Quercetin as a Dietary Supplement. *Mol Nutr Food Res.* 2018 Jan;62(1).  
458 <https://doi.org/10.1002/mnfr.201700447>. PMID: 29127724.
- 459 30. Shahzad H, Giribabu N, Sekaran M, Salleh N. Quercetin Induces Dose-Dependent Differential  
460 Morphological and Proliferative Changes in Rat Uteri in the Presence and in the Absence of Estrogen. *J*  
461 *Med Food.* 2015 Dec;18(12):1307-16. <https://doi.org/10.1089/jmf.2014.3293>. PMID: 26135605.
- 462 31. Keating GM. Dasatinib: A Review in Chronic Myeloid Leukaemia and Ph+ Acute Lymphoblastic  
463 Leukaemia. *Drugs.* 2017 Jan;77(1):85-96. <https://doi.org/10.1007/s40265-016-0677-x>. PMID: 28032244.
- 464 32. Yilmaz O, Oztay F, Kayalar O. Dasatinib attenuated bleomycin-induced pulmonary fibrosis in  
465 mice. *Growth Factors.* 2015;33(5-6):366-75. <https://doi.org/10.3109/08977194.2015.1109511>. PMID:  
466 26607773.

- 467 33. Balasubramanian S, Pleasant DL, Kasiganesan H, Quinones L, Zhang Y, Sundararaj KP, et al.  
468 Dasatinib Attenuates Pressure Overload Induced Cardiac Fibrosis in a Murine Transverse Aortic  
469 Constriction Model. *Plos One*. 2015;10(10):e0140273. <https://doi.org/10.1371/journal.pone.0140273>.  
470 PMID: 26458186.
- 471 34. Masternak MM, Al-Regaiey KA, Del Rosario Lim MM, Bonkowski MS, Panici JA, Przybylski GK, et  
472 al. Caloric restriction results in decreased expression of peroxisome proliferator-activated receptor  
473 superfamily in muscle of normal and long-lived growth hormone receptor/binding protein knockout  
474 mice. *J Gerontol A Biol Sci Med Sci*. 2005 Oct;60(10):1238-45.  
475 <https://doi.org/10.1093/gerona/60.10.1238>. PMID: 16282554.
- 476 35. Kazi AA, Molitoris KH, Koos RD. Estrogen rapidly activates the PI3K/AKT pathway and hypoxia-  
477 inducible factor 1 and induces vascular endothelial growth factor A expression in luminal epithelial cells  
478 of the rat uterus. *Biol Reprod*. 2009 Aug;81(2):378-87. <https://doi.org/10.1095/biolreprod.109.076117>.  
479 PMID: 19420388.
- 480 36. Zhou S, Zhao L, Yi T, Wei Y, Zhao X. Menopause-induced uterine epithelium atrophy results from  
481 arachidonic acid/prostaglandin E2 axis inhibition-mediated autophagic cell death. *Sci Rep*. 2016 Aug  
482 10;6:31408. <https://doi.org/10.1038/srep31408>. PMID: 27506466.
- 483 37. Chong HP, Cordeaux Y, Ranjan YS, Richardson S, Liquet B, Smith GC, et al. Age-related changes in  
484 murine myometrial transcript profile are mediated by exposure to the female sex hormones. *Aging Cell*.  
485 2016 Feb;15(1):177-80. <https://doi.org/10.1111/accel.12406>. PMID: 26490259.
- 486 38. Ortega-Molina A, Serrano M. PTEN in cancer, metabolism, and aging. *Trends Endocrinol Metab*.  
487 2013 Apr;24(4):184-9. <https://doi.org/10.1016/j.tem.2012.11.002>. PMID: 23245767.
- 488 39. Nogueira A, Pires MJ, Oliveira PA. Pathophysiological Mechanisms of Renal Fibrosis: A Review of  
489 Animal Models and Therapeutic Strategies. *In Vivo*. 2017 Jan 2;31(1):1-22.  
490 <https://doi.org/10.21873/invivo.11019>. PMID: 28064215.
- 491 40. Rai V, Sharma P, Agrawal S, Agrawal DK. Relevance of mouse models of cardiac fibrosis and  
492 hypertrophy in cardiac research. *Mol Cell Biochem*. 2017 Jan;424(1-2):123-45.  
493 <https://doi.org/10.1007/s11010-016-2849-0>. PMID: 27765529.
- 494 41. Wu L, Zhang Q, Mo W, Feng J, Li S, Li J, et al. Quercetin prevents hepatic fibrosis by inhibiting  
495 hepatic stellate cell activation and reducing autophagy via the TGF-beta1/Smads and PI3K/Akt pathways.  
496 *Sci Rep*. 2017 Aug 24;7(1):9289. <https://doi.org/10.1038/s41598-017-09673-5>. PMID: 28839277.
- 497 42. Zhang X, Cai Y, Zhang W, Chen X. Quercetin ameliorates pulmonary fibrosis by inhibiting  
498 SphK1/S1P signaling. *Biochem Cell Biol*. 2018 Dec;96(6):742-51. <https://doi.org/10.1139/bcb-2017-0302>.  
499 PMID: 29940125.
- 500 43. Gao L, Yao R, Liu Y, Wang Z, Huang Z, Du B, et al. Isorhamnetin protects against cardiac  
501 hypertrophy through blocking PI3K-AKT pathway. *Mol Cell Biochem*. 2017 May;429(1-2):167-77.  
502 <https://doi.org/10.1007/s11010-017-2944-x>. PMID: 28176246.
- 503 44. Cao Y, Hu J, Sui J, Jiang L, Cong Y, Ren G. Quercetin is able to alleviate TGF-beta-induced fibrosis  
504 in renal tubular epithelial cells by suppressing miR-21. *Exp Ther Med*. 2018 Sep;16(3):2442-8.  
505 <https://doi.org/10.3892/etm.2018.6489>. PMID: 30210596.
- 506 45. Liu J, Zhang Y, Liu A, Wang J, Li L, Chen X, et al. Distinct Dasatinib-Induced Mechanisms of  
507 Apoptotic Response and Exosome Release in Imatinib-Resistant Human Chronic Myeloid Leukemia Cells.  
508 *Int J Mol Sci*. 2016 Apr 8;17(4):531. <https://doi.org/10.3390/ijms17040531>. PMID: 27070592.
- 509 46. Cazzola M, Matera MG, Rogliani P, Calzetta L. Senolytic drugs in respiratory medicine: is it an  
510 appropriate therapeutic approach? *Expert Opin Investig Drugs*. 2018 Jul;27(7):573-81.  
511 <https://doi.org/10.1080/13543784.2018.1492548>. PMID: 29972333.
- 512 47. Justice JN, Nambiar AM, Tchkonja T, LeBrasseur NK, Pascual R, Hashmi SK, et al. Senolytics in  
513 idiopathic pulmonary fibrosis: Results from a first-in-human, open-label, pilot study. *EBioMedicine*. 2019  
514 Feb;40:554-63. <https://doi.org/10.1016/j.ebiom.2018.12.052>. PMID: 30616998.

- 515 48. Roos CM, Zhang B, Palmer AK, Ogrodnik MB, Pirtskhalava T, Thalji NM, et al. Chronic senolytic  
516 treatment alleviates established vasomotor dysfunction in aged or atherosclerotic mice. *Aging Cell*. 2016  
517 Oct;15(5):973-7. <https://doi.org/10.1111/accel.12458>. PMID: 26864908.
- 518 49. Srivastava S, Somasagara RR, Hegde M, Nishana M, Tadi SK, Srivastava M, et al. Quercetin, a  
519 Natural Flavonoid Interacts with DNA, Arrests Cell Cycle and Causes Tumor Regression by Activating  
520 Mitochondrial Pathway of Apoptosis. *Sci Rep*. 2016 Apr 12;6:24049. <https://doi.org/10.1038/srep24049>.  
521 PMID: 27068577.
- 522 50. Dos Santos C, McDonald T, Ho YW, Liu H, Lin A, Forman SJ, et al. The Src and c-Kit kinase  
523 inhibitor dasatinib enhances p53-mediated targeting of human acute myeloid leukemia stem cells by  
524 chemotherapeutic agents. *Blood*. 2013 Sep 12;122(11):1900-13. [https://doi.org/10.1182/blood-2012-  
525 11-466425](https://doi.org/10.1182/blood-2012-11-466425). PMID: 23896410.
- 526 51. Goeman F, Strano S, Blandino G. MicroRNAs as Key Effectors in the p53 Network. *Int Rev Cell*  
527 *Mol Biol*. 2017;333:51-90. <https://doi.org/10.1016/bs.ircmb.2017.04.003>. PMID: 28729028.
- 528 52. Huang Y, Qi Y, Du JQ, Zhang DF. MicroRNA-34a regulates cardiac fibrosis after myocardial  
529 infarction by targeting Smad4. *Expert Opin Ther Targets*. 2014 Dec;18(12):1355-65.  
530 <https://doi.org/10.1517/14728222.2014.961424>. PMID: 25322725.
- 531 53. Liu Y, Bi X, Xiong J, Han W, Xiao T, Xu X, et al. MicroRNA-34a Promotes Renal Fibrosis by  
532 Downregulation of Klotho in Tubular Epithelial Cells. *Mol Ther*. 2019 May 8;27(5):1051-65.  
533 <https://doi.org/10.1016/j.ymthe.2019.02.009>. PMID: 30853453.
- 534 54. Bernardo BC, Gao XM, Winbanks CE, Boey EJ, Tham YK, Kiriazis H, et al. Therapeutic inhibition of  
535 the miR-34 family attenuates pathological cardiac remodeling and improves heart function. *Proc Natl*  
536 *Acad Sci U S A*. 2012 Oct 23;109(43):17615-20. <https://doi.org/10.1073/pnas.1206432109>. PMID:  
537 23047694.
- 538 55. Slabakova E, Culig Z, Remsik J, Soucek K. Alternative mechanisms of miR-34a regulation in  
539 cancer. *Cell Death Dis*. 2017 Oct 12;8(10):e3100. <https://doi.org/10.1038/cddis.2017.495>. PMID:  
540 29022903.
- 541 56. Schneider A, Matkovich SJ, Victoria B, Spinel L, Bartke A, Golusinski P, et al. Changes of Ovarian  
542 microRNA Profile in Long-Living Ames Dwarf Mice during Aging. *Plos One*. 2017;12(1):e0169213.  
543 <https://doi.org/10.1371/journal.pone.0169213>. PMID: 28046124.
- 544 57. Victoria B, Dhahbi JM, Nunez Lopez YO, Spinel L, Atamna H, Spindler SR, et al. Circulating  
545 microRNA signature of genotype-by-age interactions in the long-lived Ames dwarf mouse. *Aging Cell*.  
546 2015 Dec;14(6):1055-66. <https://doi.org/10.1111/accel.12373>. PMID: 26176567.

548 **Figure Legends**

549

550 **Figure 1:** Uterine type 1 collagen deposition evaluation. (A) Collagen-1 statistical Western Blot  
551 analysis, letters indicate differences between groups ( $p < 0.05$ ), values were plotted as mean  $\pm$   
552 standard error of the mean. (B) Collagen-1 and  $\beta$ -actin Western Blot bands. (C) Representative  
553 Masson's Trichrome stained images of uterine tissue. OT: old treatment; OC: old control; YT:  
554 young treatment; YC: young control.

555

556 **Figure 2:** Analysis of relative uterine gene expression in treatment and control groups at  
557 different ages. A. Phosphoinositide 3-kinase (*Pi3k*). B. Protein kinase B (*Akt*). C. Mammalian  
558 target of rapamycin (*mTor*). D. Phosphatase and tensin homolog (*Pten*). E. p53. Values are  
559 shown as mean  $\pm$  standard error of the mean. Two-way ANOVA was performed and the p values  
560 for age, treatment, and their interaction are presented ( $p < 0.05$ ).

561

562 **Figure 3:** Analysis of relative uterine microRNA levels in the treatment and control groups at  
563 different ages. A. mmu-miR-34a-5p (miR34a). B. hsa-miR-34b-5p (miR34b). C. mmu-miR-34c-  
564 5p (miR34c). D. mmu-miR-146a-5p (miR146a). E. mmu-miR-449a-5p (miR449a). F. mmu-  
565 miR-21a-5p (miR21a). G. mmu-miR-126a-5p (miR126a). H. hsa-miR-181b-5p (miR181b).  
566 Values are shown as mean  $\pm$  standard error of the mean. Two-way ANOVA was performed and  
567 p values for age, treatment, and their interaction are presented ( $p < 0.05$ ).



# Collagen-1

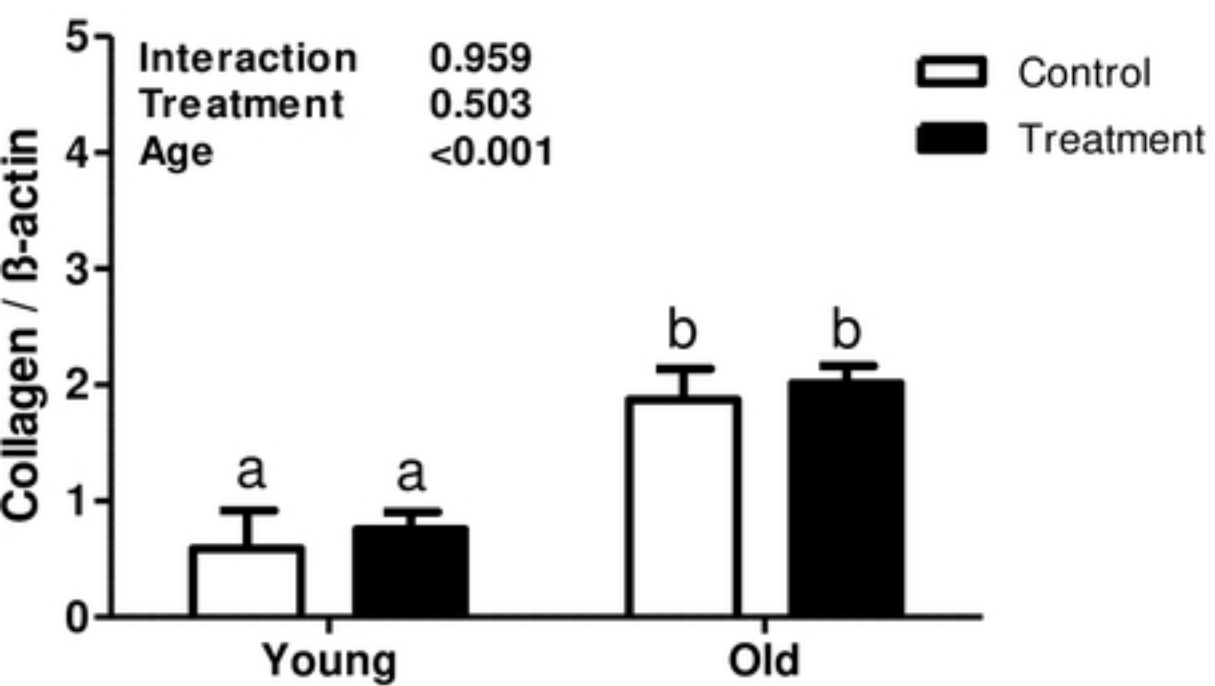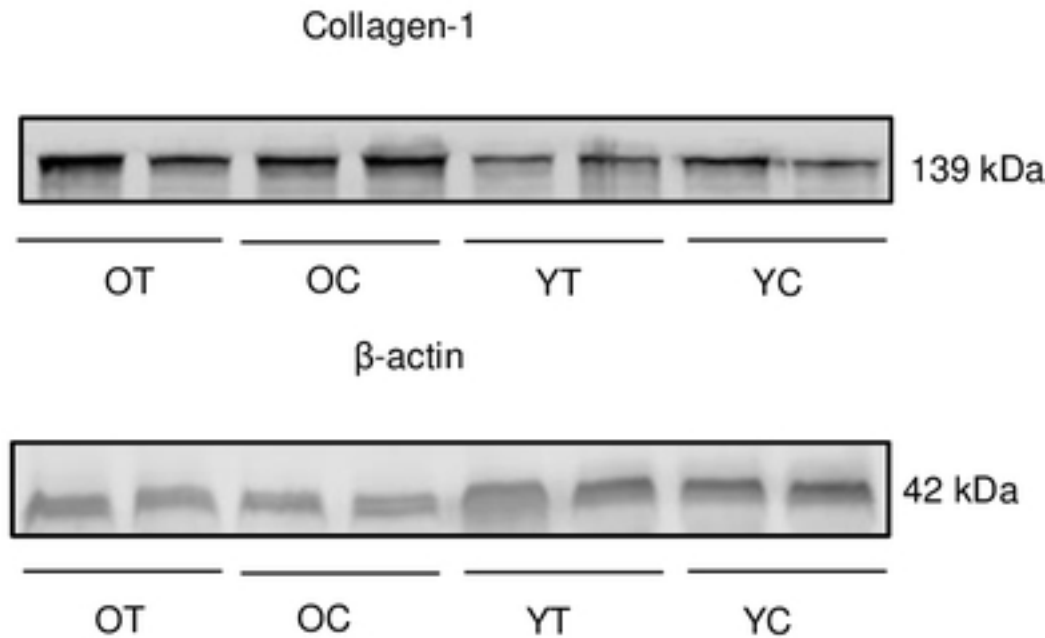

bioRxiv preprint doi: <https://doi.org/10.1101/823229>; this version posted October 29, 2019. The copyright holder for this preprint (which was not certified by peer review) is the author/funder, who has granted bioRxiv a license to display the preprint in perpetuity. It is made available under aCC-BY 4.0 International license.

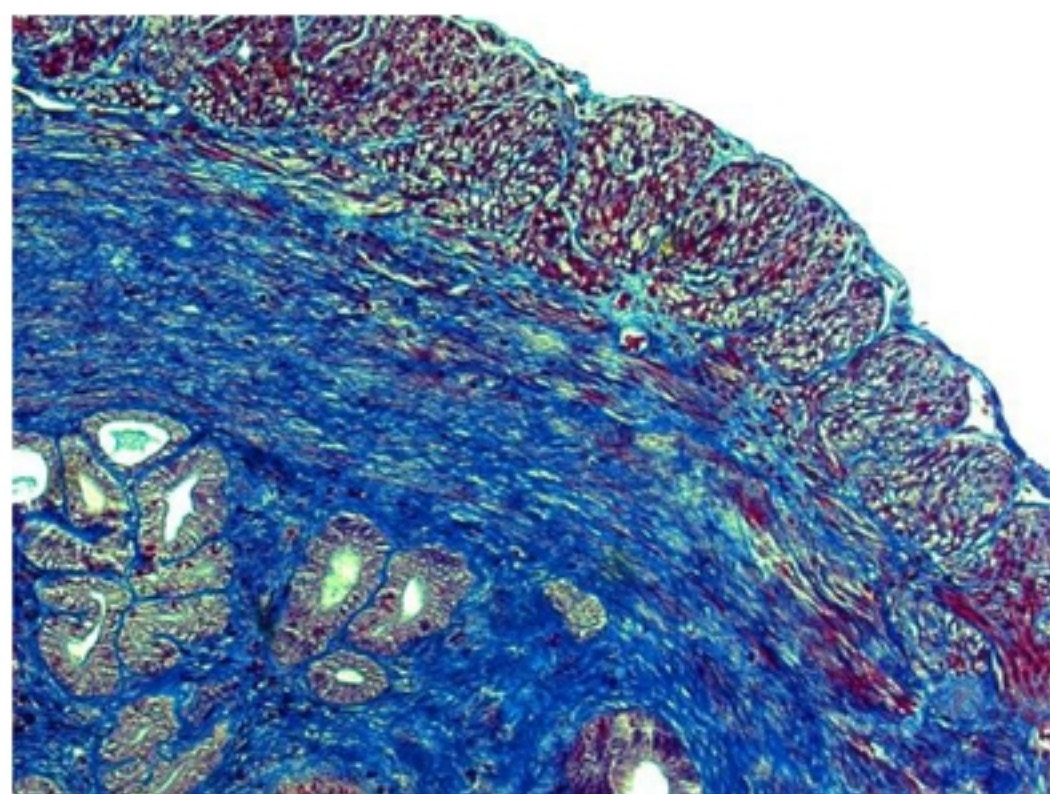

Old treatment

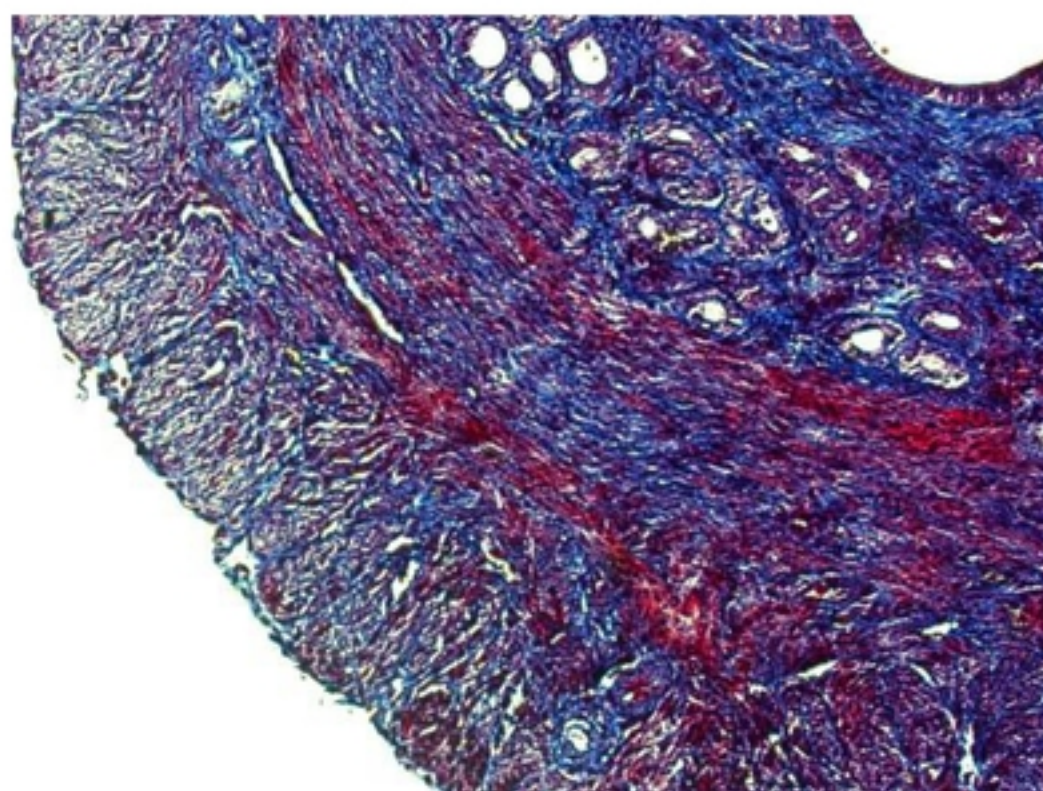

Old control

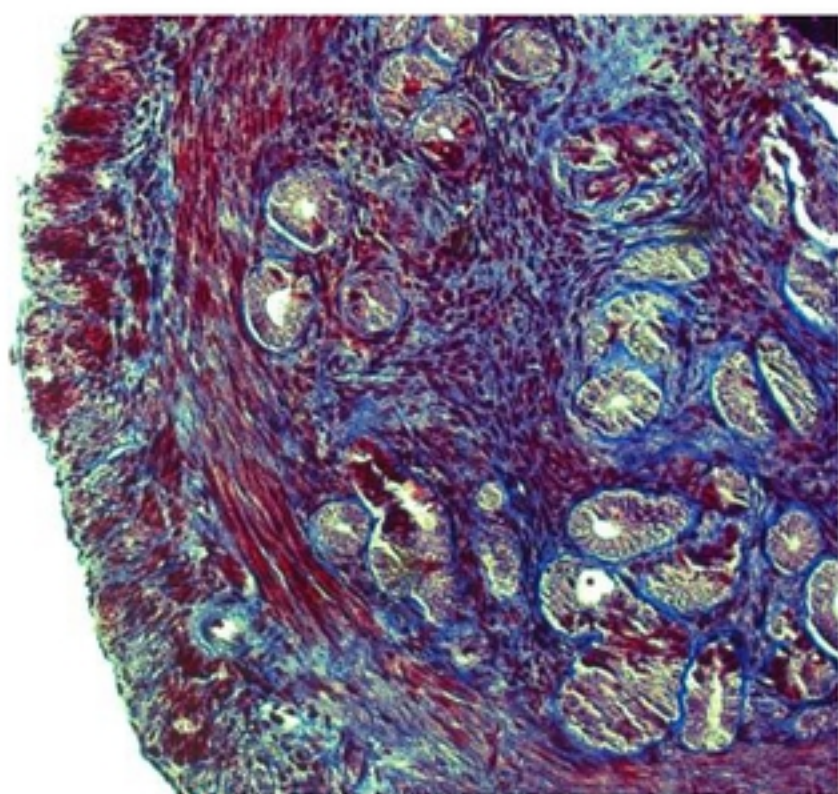

Young treatment

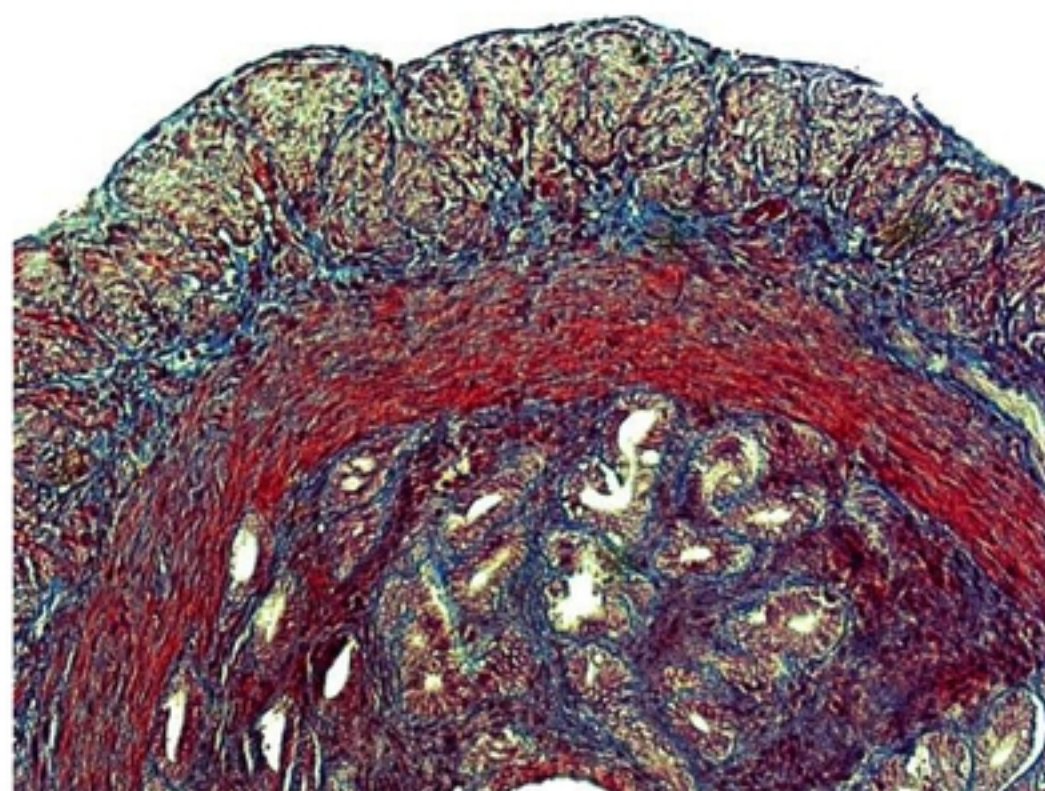

Young control

Figure 1



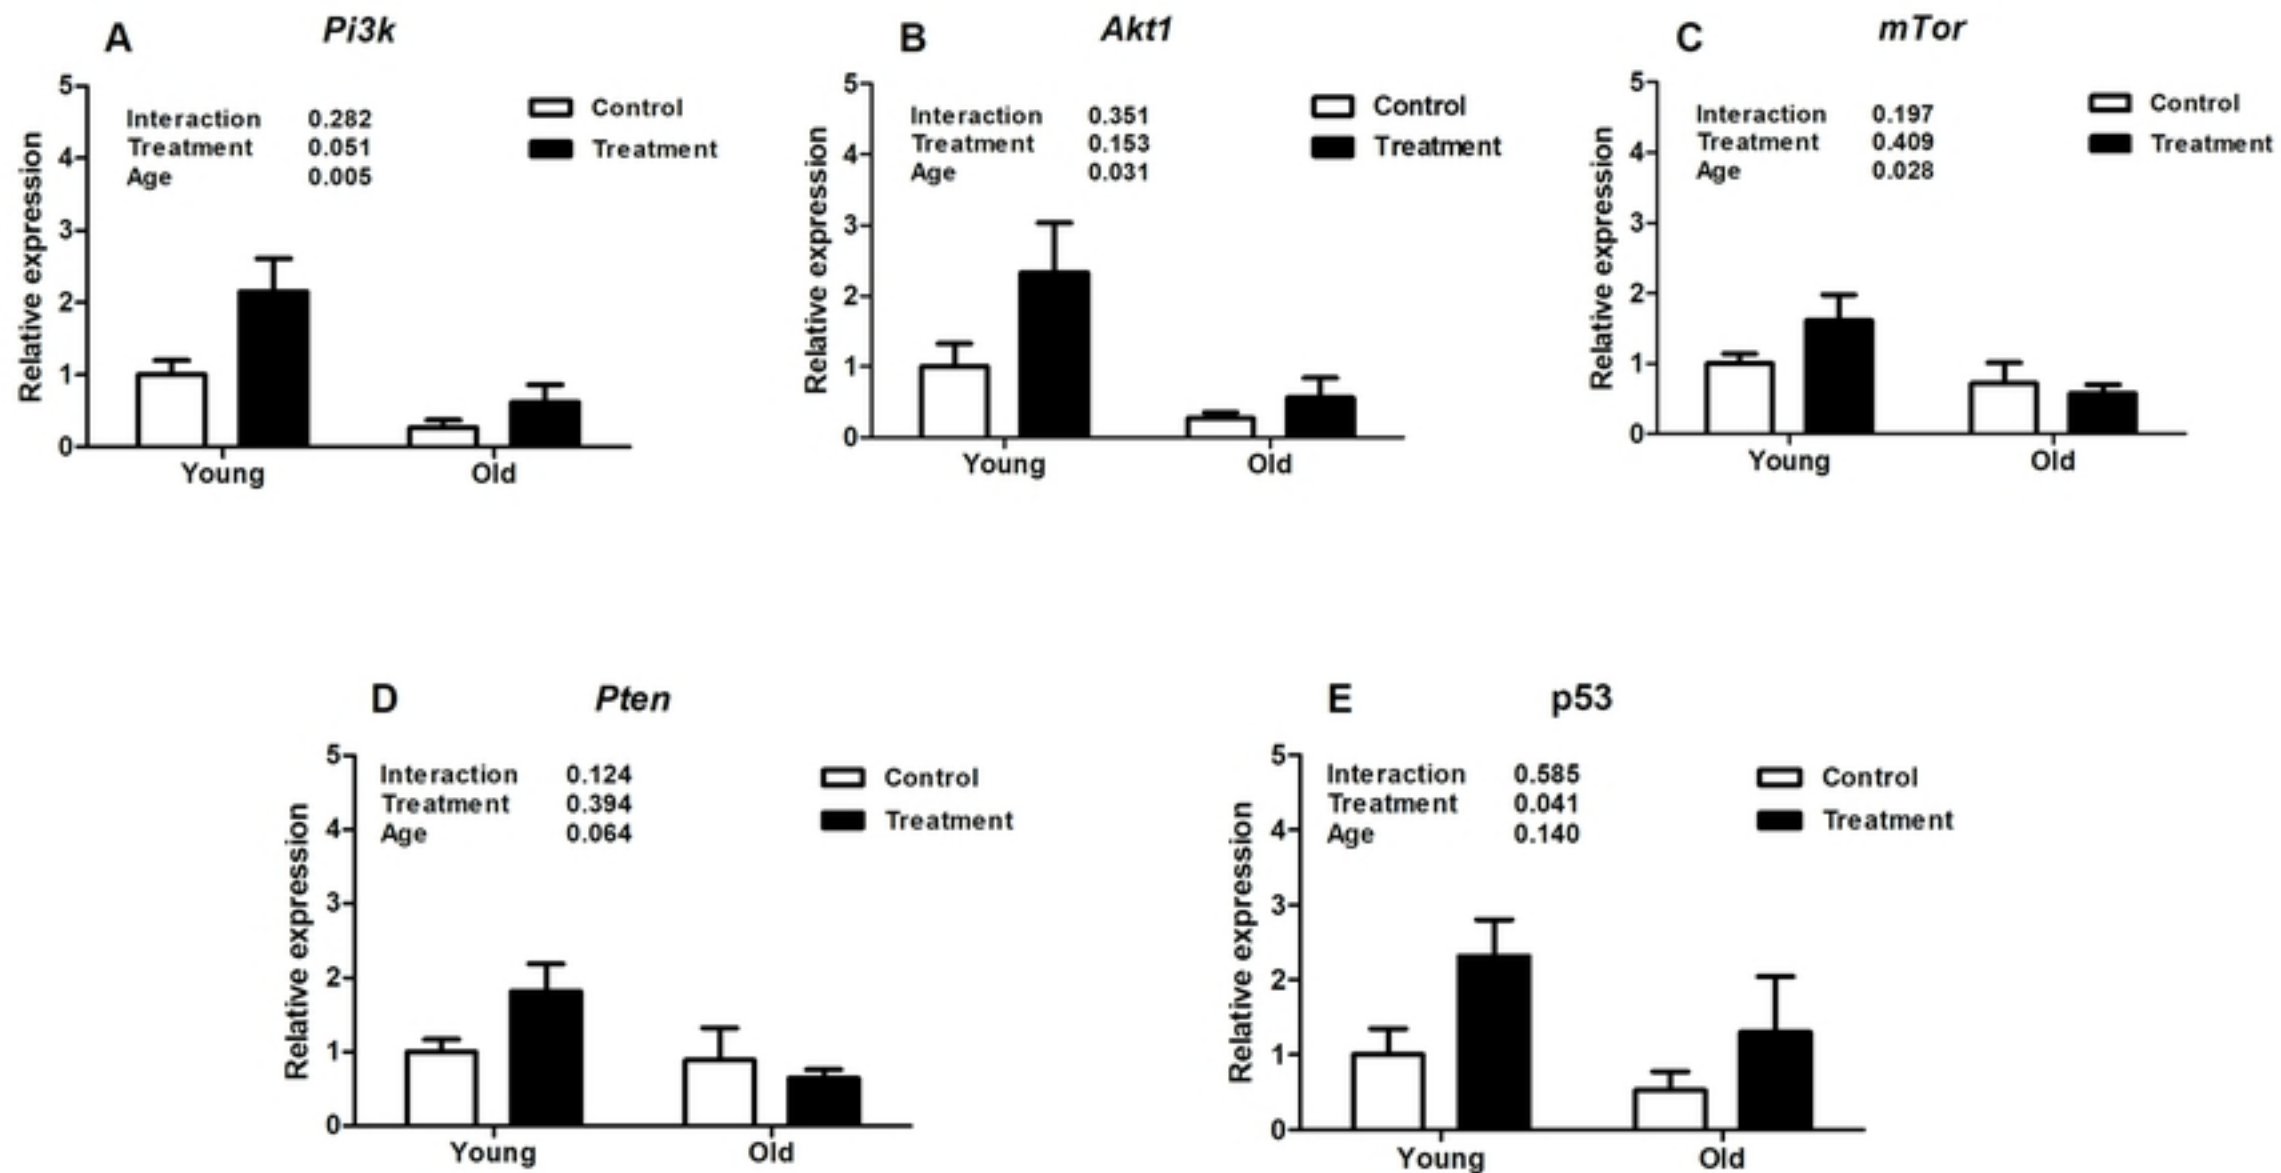

Figure 2

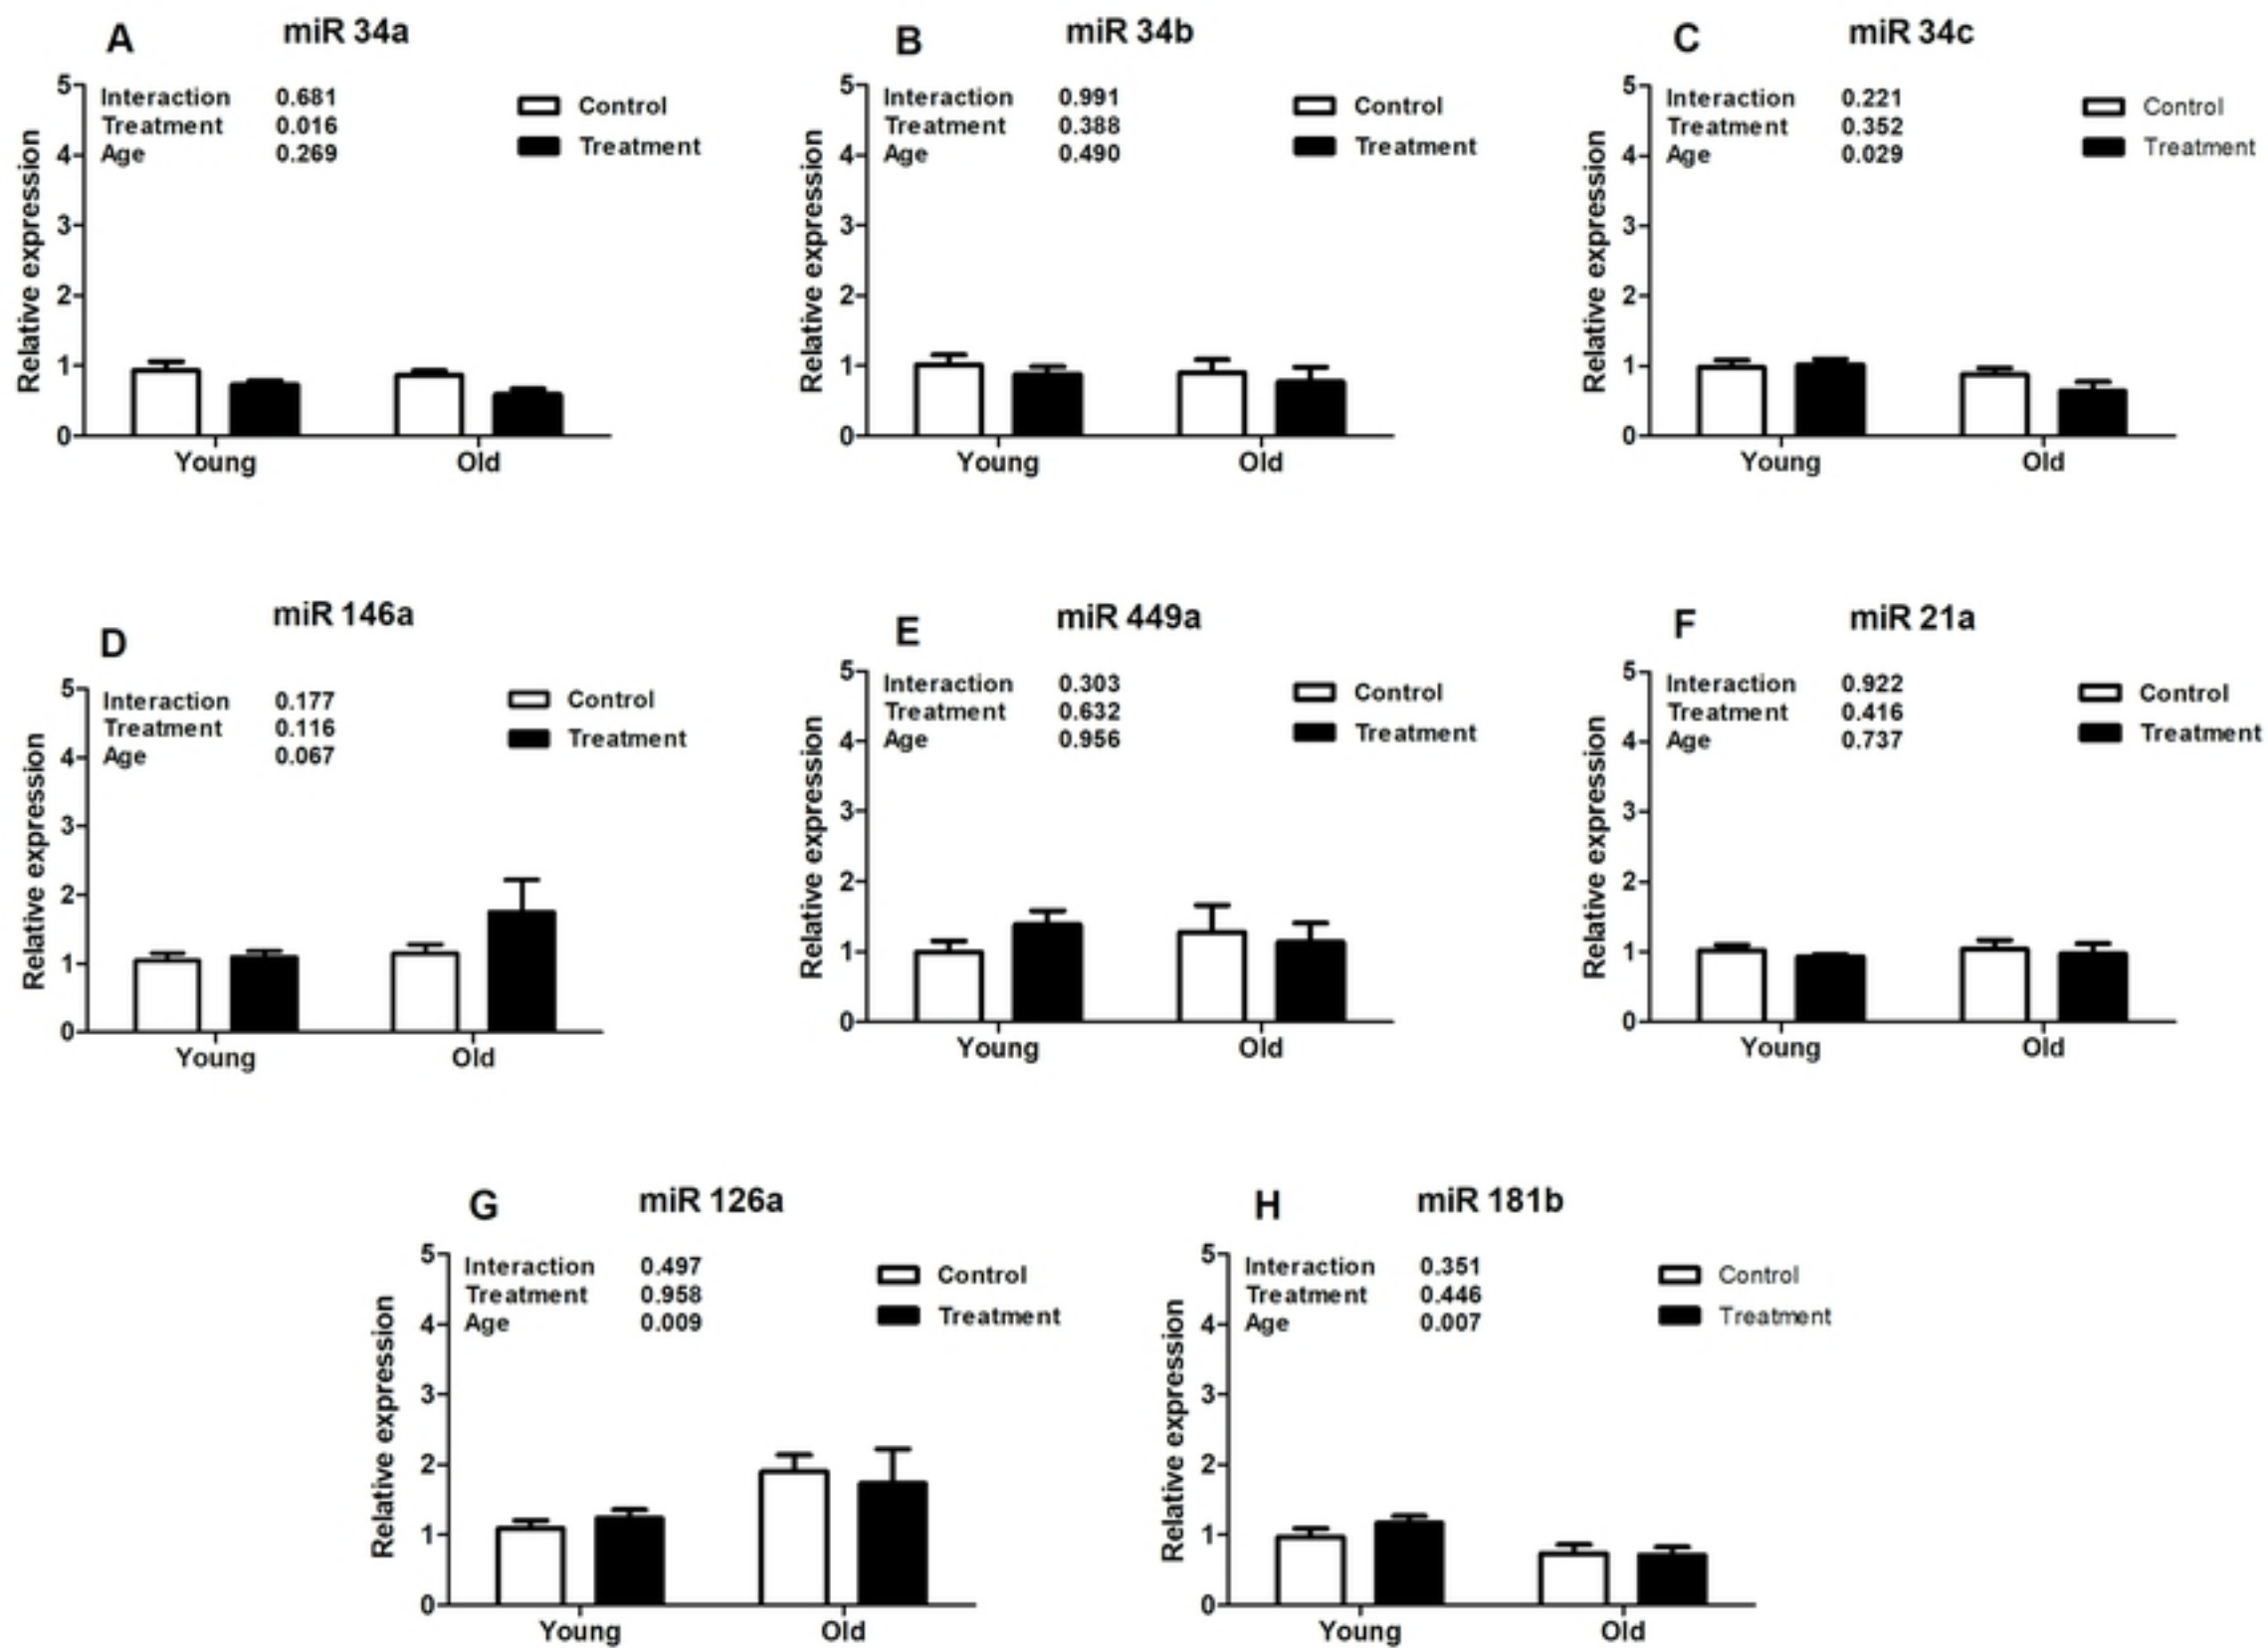

Figure 3
